# Supplementary material
Source: Springer Nature journal article supplement (http://www.springermedizin.de/resource/supplementary/13002_2006_71_MOESM3_ESM.pdf/9627170)

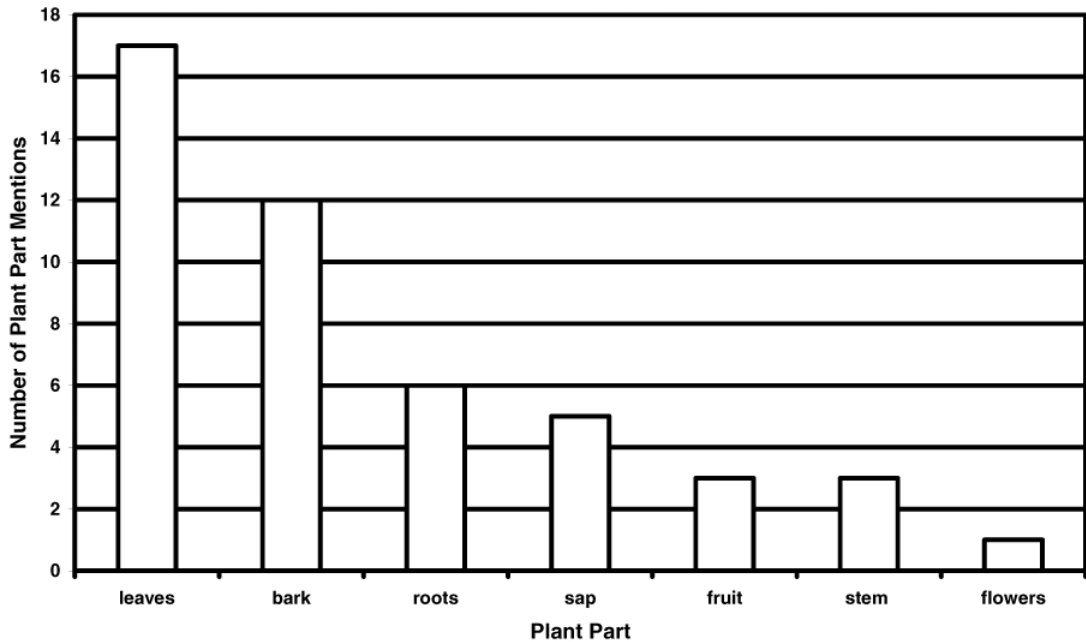

Supplement: MOESM3 [file 9627170]
